# Supplementary material for: The political potential of a wellbeing approach: A case study from Zambia:Based on the published paper: The Politics of Wellbeing, Conservation and Development in Chiawa, Zambia
Source: Royal Society of Chemistry journal article supplement (doi:10.1039/d1ra00885d), 2013-01-01
Supplement: d1ra00885d1.pdf [file d1ra00885d1.pdf]

Supporting Information

**Electron beam lithography for direct patterning of MoS<sub>2</sub> on PDMS substrates**

Gil Jumbert<sup>1,2</sup>, Marcel Placidi<sup>3,4</sup>, Francesc Alzina<sup>1</sup>, Clivia M. Sotomayor Torres<sup>1,5</sup> and Marianna Sledzinska<sup>1\*</sup>

<sup>1</sup> Catalan Institute of Nanoscience and Nanotechnology (ICN2), CSIC and BIST, Campus UAB, Bellaterra, 08193 Barcelona, Spain

<sup>2</sup> Departament de Física, Universitat Autònoma de Barcelona, Bellaterra, E-08193 Barcelona, Spain

<sup>3</sup> Catalonia Institute for Energy Research (IREC), Jardins de les Dones de Negre 1, Sant Adrià de Besòs, Spain

<sup>4</sup> Photovoltaic Group, Electronic Engineering Department, Polytechnic University of Catalonia (UPC), Barcelona, Spain

<sup>5</sup> ICREA, Pg. Lluís Companys 23, 08010 Barcelona, Spain

\*Corresponding author: marianna.sledzinska@icn2.cat

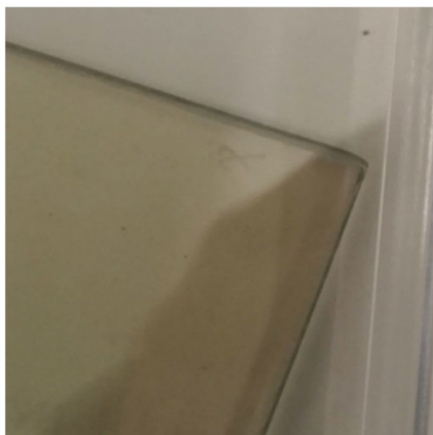

**Figure S1.** Photograph of the MoS<sub>2</sub> film grown on 10x10 cm glass substrate.

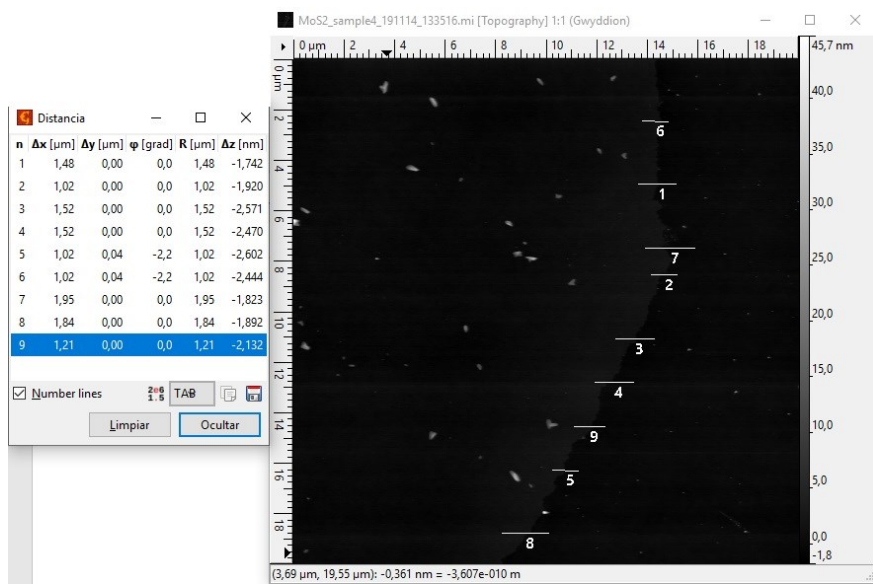

**Figure S2.** Atomic force microscopy measurements of the thickness of the MoS<sub>2</sub> film.

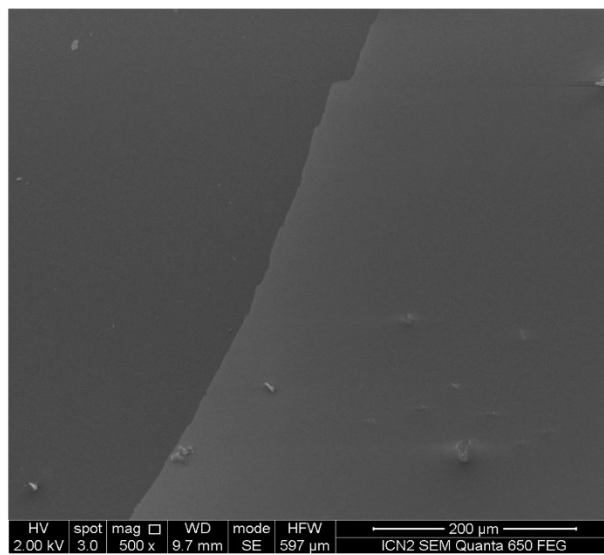

**Figure S3.** Scanning microscope image of the MoS<sub>2</sub> film grown on glass substrate.

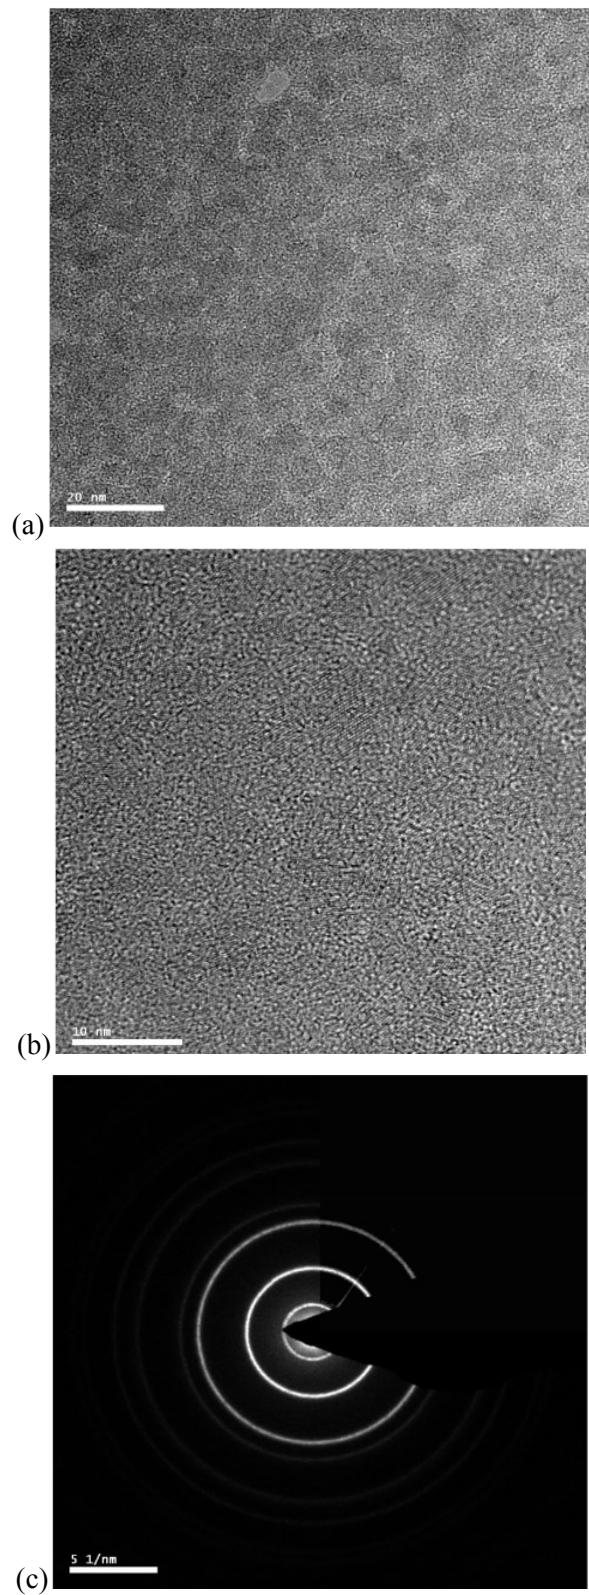

**Figure S4.** (a),(b)Transmission electron microscopy images and (c) diffraction pattern of the MoS<sub>2</sub> film, showing its clear polycrystalline structure.

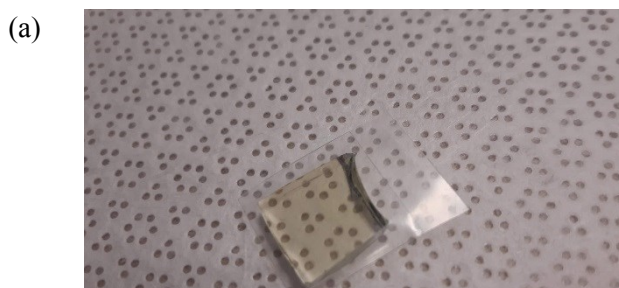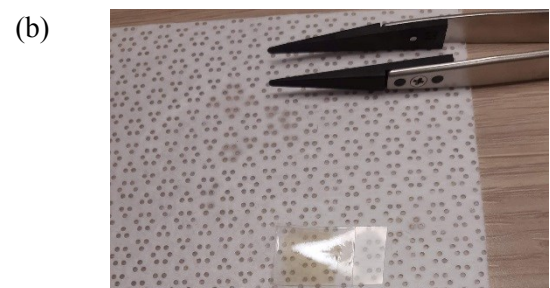

**Figure S5.** Wet transfer of MoS<sub>2</sub> from the original glass substrate. (a) PDMS directly in contact with MoS<sub>2</sub> on glass, a drop of DI water being placed at the interface (b) MoS<sub>2</sub> transferred to PDMS.

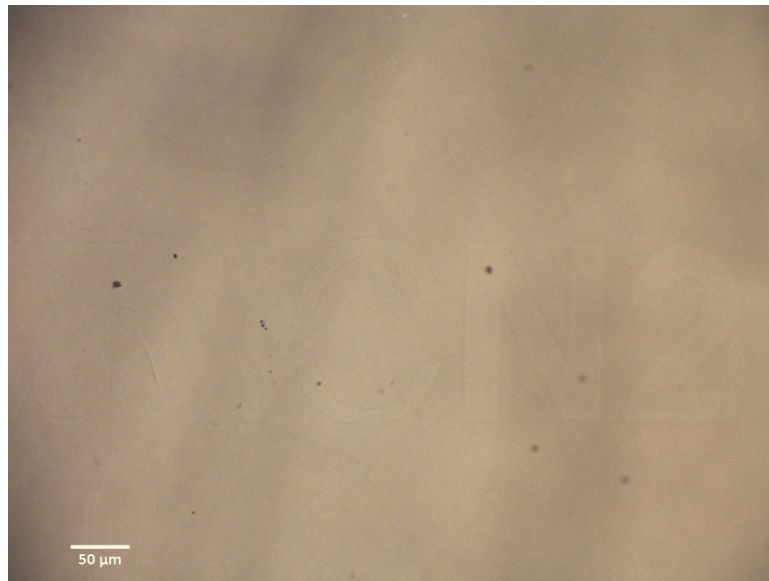

**Figure S6.** Example of the ICN2 logo exposed on PDMS/MoS<sub>2</sub> using 10 kV acceleration voltage and 300 μC/cm<sup>2</sup> dose.

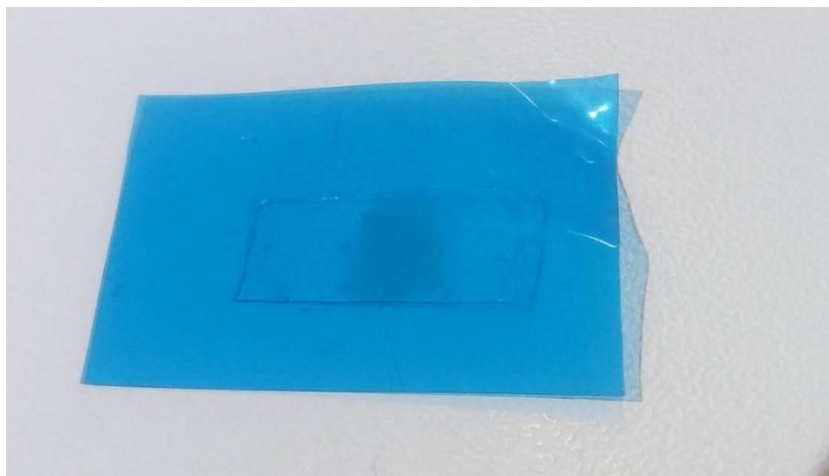

**Figure S7.** Dry transfer from the PDMS after EBL to the PET substrate.



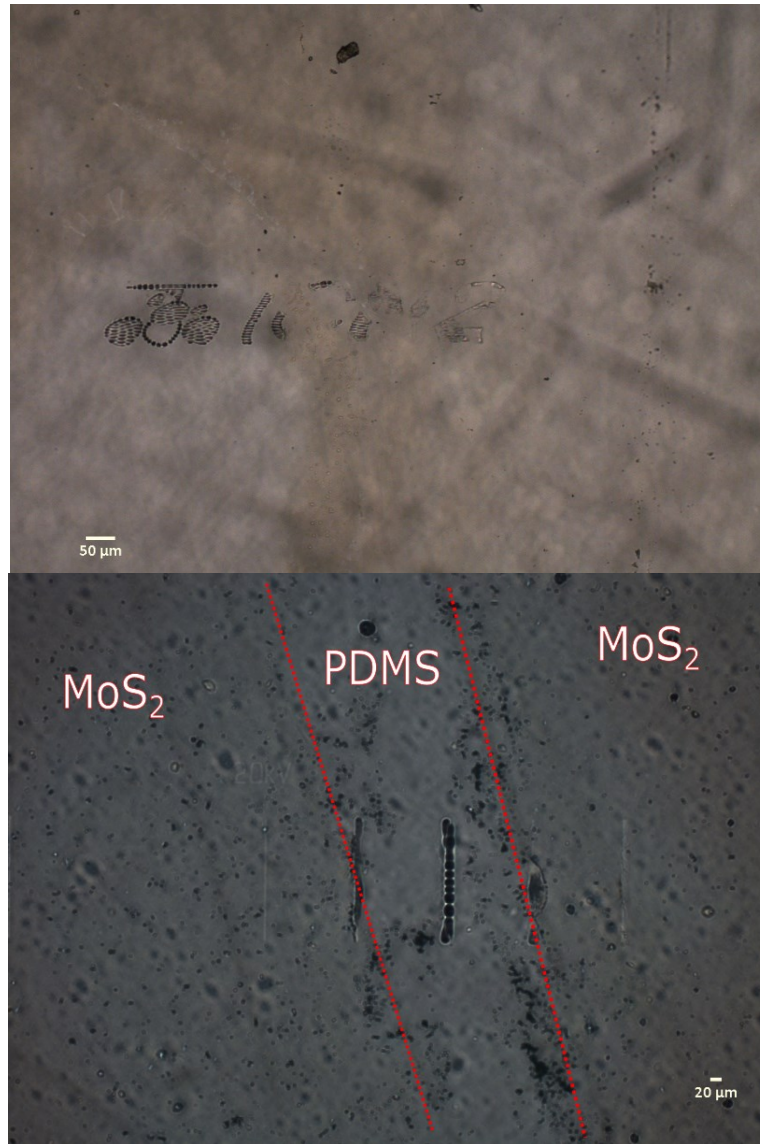

**Figure S8.** Examples of the EBL on MoS<sub>2</sub>/PDMS. The exposures of PDMS only results in black, not well defined patterns. The exposures of MoS<sub>2</sub>/PDMS yield well defined patterns. Top:10 kV acceleration voltage and 400 μC/cm<sup>2</sup> dose. Bottom:20 kV acceleration voltage and 700 μC/cm<sup>2</sup> dose.

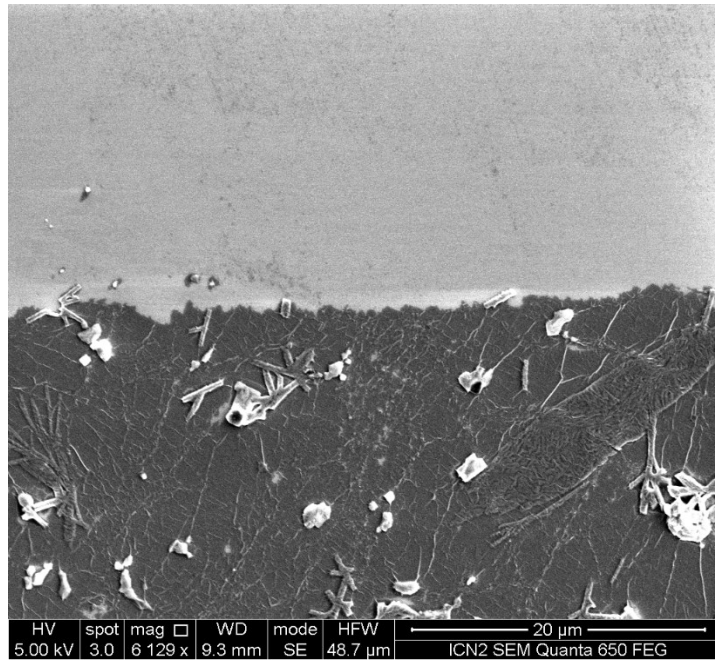

**Figure S9.** Example of an unsuccessful transfer of MoS<sub>2</sub> from PDMS to Si/SiO<sub>2</sub>. The MoS<sub>2</sub> is clearly wrinkled and broken.
